# Supplementary material
Source: Springer Nature journal article supplement (https://www.springermedizin.de/resource/supplementary/12871_2008_63_MOESM6_ESM.pdf/9429580)

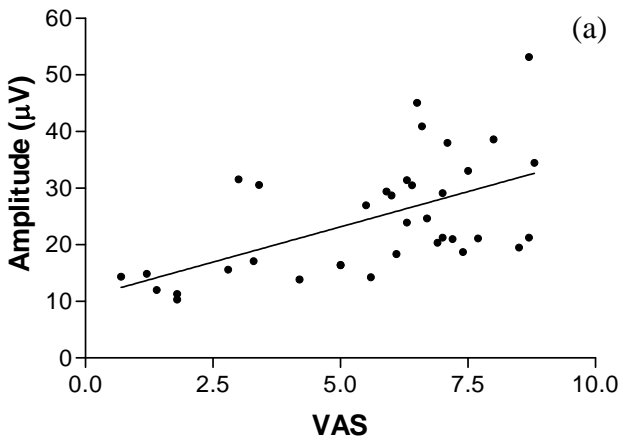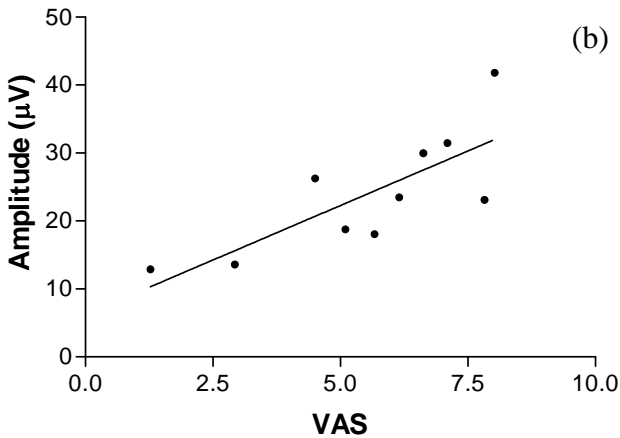

Supplement: MOESM6 [file 9429580]
